# Supplementary material for: Mechanistic characterization of a Drosophila model of paraneoplastic nephrotic syndrome
Source: PubMed Central journal article supplement (PMC10858251; doi:10.1038/s41467-024-45493-8), 2024-02-09
Supplement: 41467_2024_45493_MOESM3_ESM.pdf [file 41467_2024_45493_MOESM3_ESM.pdf]

## **Description of Additional Supplementary Files**

**Supplementary Data 1.** Upregulated genes upon Pvr depletion in main segment principal cells. Top 50 upregulated genes Pvr\_RNAi vs Ctrl in main segment principal cells were listed.

**Supplementary Data 2.** Differential expressed genes (DEGs) upon Pvr depletion and activation in all MT cells. DEGs in Pvr\_RNAi and Pvr\_act samples compared with ctrl were listed.

**Supplementary Data 3.** Primers used for qRT-PCR
